# Supplementary material for: A Validated Set of Fluorescent-Protein-Based Markers for Major Organelles in Yeast (Saccharomyces cerevisiae)
Source: PubMed Central journal article supplement (PMC6722415; doi:10.1128/mbio.01691-19), 2019-09-03

**A**

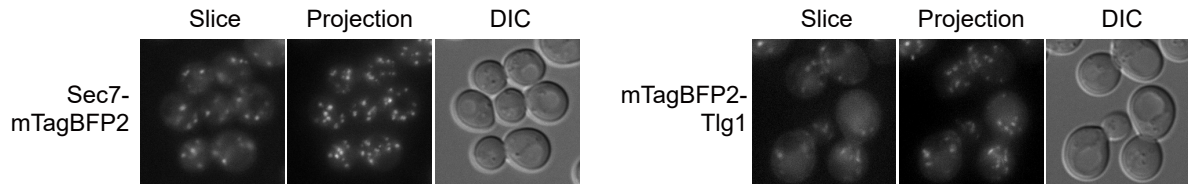

**B**

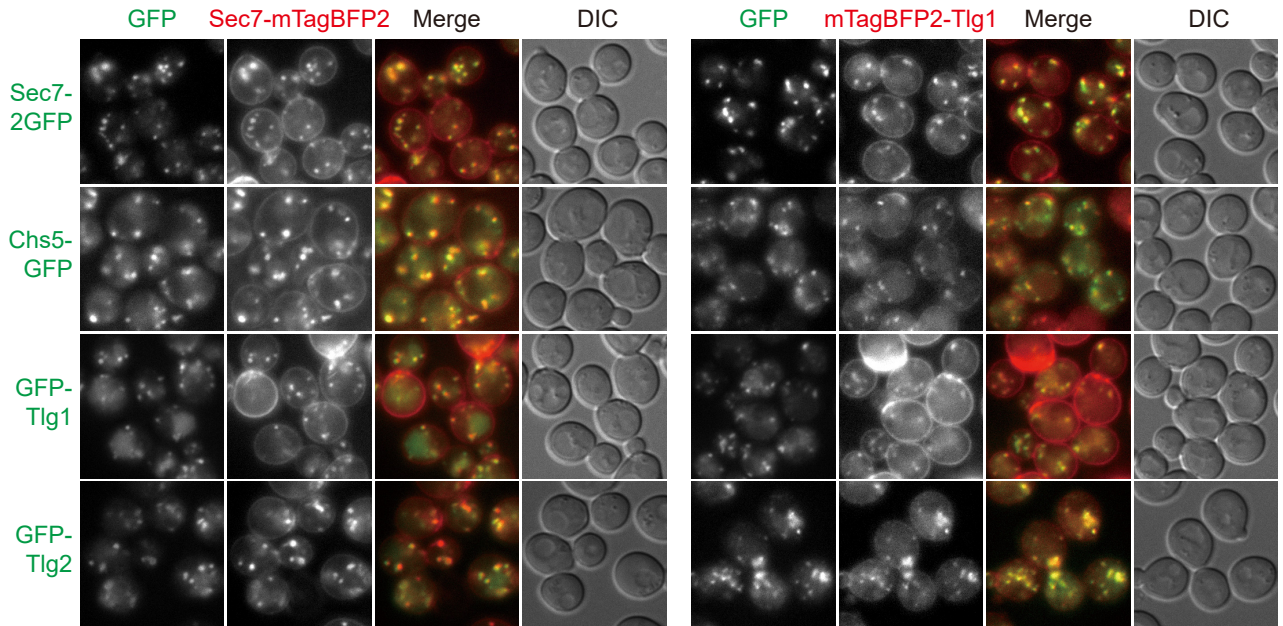

**C**

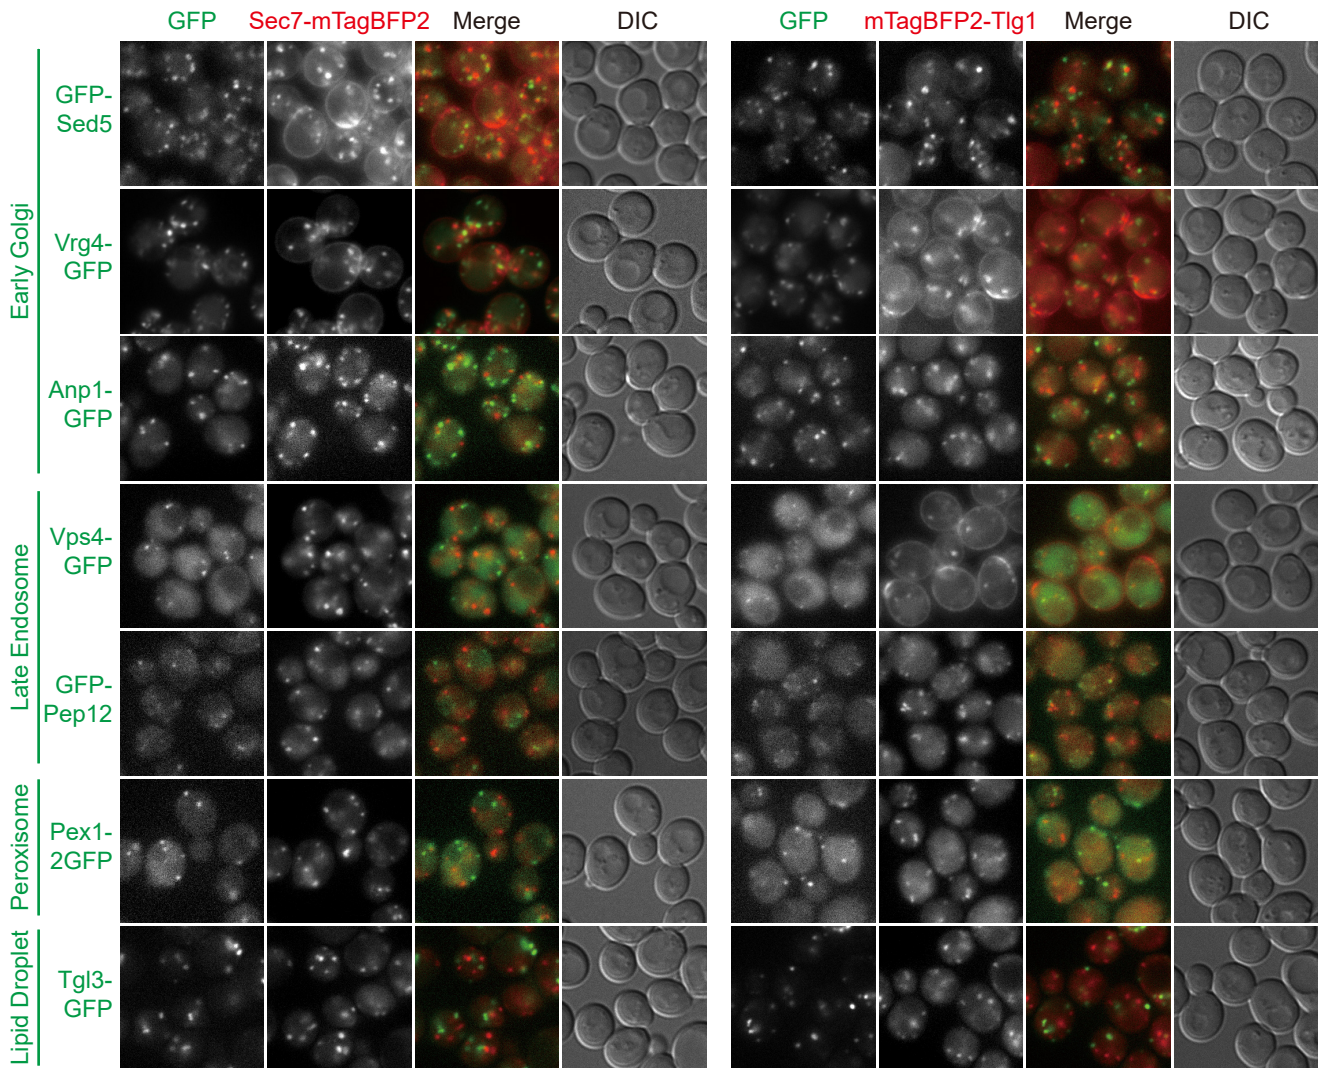

Supplement: mBio.01691-19-sf006.pdf [file mBio.01691-19-sf006.pdf]
